# Supplementary material
Source: MDPI journal article supplement (https://www.mdpi.com/search?q=molbank-2023-M1546)
Supplement: s002 [file molbank-2023-M1546-s002.mol]

compound 1.mol
  ChemDraw12122215312D

 27 29  0  0  0  0  0  0  0  0999 V2000
   -3.9295    0.4125    0.0000 C   0  0  0  0  0  0  0  0  0  0  0  0
   -3.9295   -0.4125    0.0000 C   0  0  0  0  0  0  0  0  0  0  0  0
   -3.2150   -0.8250    0.0000 C   0  0  0  0  0  0  0  0  0  0  0  0
   -2.5005   -0.4125    0.0000 C   0  0  0  0  0  0  0  0  0  0  0  0
   -2.5005    0.4125    0.0000 C   0  0  0  0  0  0  0  0  0  0  0  0
   -3.2150    0.8250    0.0000 C   0  0  0  0  0  0  0  0  0  0  0  0
   -3.2150    1.6500    0.0000 C   0  0  0  0  0  0  0  0  0  0  0  0
   -3.2150   -1.6500    0.0000 C   0  0  0  0  0  0  0  0  0  0  0  0
   -2.5005   -2.0624    0.0000 C   0  0  0  0  0  0  0  0  0  0  0  0
   -3.9295   -2.0624    0.0000 C   0  0  0  0  0  0  0  0  0  0  0  0
   -1.7861    0.8250    0.0000 N   0  0  0  0  0  0  0  0  0  0  0  0
   -1.7861   -0.8250    0.0000 O   0  0  0  0  0  0  0  0  0  0  0  0
   -1.0717    0.4125    0.0000 C   0  0  0  0  0  0  0  0  0  0  0  0
   -0.3572    0.8250    0.0000 C   0  0  0  0  0  0  0  0  0  0  0  0
   -0.3572    1.6500    0.0000 N   0  0  0  0  0  0  0  0  0  0  0  0
   -1.0717    2.0624    0.0000 C   0  0  0  0  0  0  0  0  0  0  0  0
   -1.7861    1.6500    0.0000 C   0  0  0  0  0  0  0  0  0  0  0  0
    0.3572    2.0624    0.0000 C   0  0  0  0  0  0  0  0  0  0  0  0
    1.0717    1.6500    0.0000 C   0  0  0  0  0  0  0  0  0  0  0  0
    1.0717    0.8250    0.0000 C   0  0  0  0  0  0  0  0  0  0  0  0
    1.7861    0.4125    0.0000 C   0  0  0  0  0  0  0  0  0  0  0  0
    2.5005    0.8250    0.0000 C   0  0  0  0  0  0  0  0  0  0  0  0
    2.5005    1.6500    0.0000 C   0  0  0  0  0  0  0  0  0  0  0  0
    1.7861    2.0624    0.0000 C   0  0  0  0  0  0  0  0  0  0  0  0
    3.2150    0.4125    0.0000 C   0  0  0  0  0  0  0  0  0  0  0  0
    3.9295    0.8250    0.0000 C   0  0  0  0  0  0  0  0  0  0  0  0
    3.2150   -0.4125    0.0000 C   0  0  0  0  0  0  0  0  0  0  0  0
  1  2  1  0      
  2  3  1  0      
  3  4  1  0      
  4  5  1  0      
  5  6  1  0      
  6  1  2  0      
  6  7  1  0      
  3  8  1  6      
  8  9  2  0      
  8 10  1  0      
  5 11  1  1      
  4 12  1  6      
 11 13  1  0      
 13 14  1  0      
 14 15  1  0      
 15 16  1  0      
 16 17  1  0      
 17 11  1  0      
 15 18  1  0      
 18 19  1  0      
 19 20  2  0      
 20 21  1  0      
 21 22  2  0      
 22 23  1  0      
 23 24  2  0      
 24 19  1  0      
 22 25  1  0      
 25 26  1  0      
 25 27  1  0      
M  END
